# Supplementary material
Source: PubMed Central journal article supplement (PMC5795395)
Supplement: supp_RA117.000378_132879_0_supp_9969_zx92zg.pdf [file supp_RA117.000378_132879_0_supp_9969_zx92zg.pdf]

**Supplemental data table 1S: Primer sequences used for  $\Delta$ *ptpB* construction**

The following primer sequences were used to construct the deletion mutant  $\Delta$ *ptpB*

| primer   | sequence                                        |
|----------|-------------------------------------------------|
| ptpB_1   | TTGAATGGCCGATCGATGGTATTG                        |
| ptpB_2   | TAATTTGTTTCGATGTATTCAAATAGTTCACATCCTTTAATAATG   |
| ptpB_3   | AAATAACAGATTAATAAATTATAATAGGAATTCTGTATAATTAGTAT |
| ptpB_4   | TCCTTACAGGTACACATACATGT                         |
| spec_for | AATAACGTAACGTGACTGGC                            |
| spec_rev | CGGGGCTGGCTTAACTATGC                            |
