# Supplementary material
Source: PubMed Central journal article supplement (PMC5795395)
Supplement: supp_RA117.000378_132879_0_supp_9970_wx92wg.pdf [file supp_RA117.000378_132879_0_supp_9970_wx92wg.pdf]

**Supplemental data table 2S: Chemicals used for stress conditions**

For construction of spectral libraries, different cultivation conditions were applied. Stress conditions were applied using the chemicals and concentrations listed below.

| stress condition                    | IUPAC name of chemical                             | ordered as                                               | ordered by                                  |
|-------------------------------------|----------------------------------------------------|----------------------------------------------------------|---------------------------------------------|
| 0.1 mM Methylviologen               | <i>N,N'</i> -dimethyl-4,4'-bipyridinium dichloride | methyl viologen dichloride hydrate, 98%                  | sigma-aldrich, St. Louis, USA               |
| 10 mM H <sub>2</sub> O <sub>2</sub> | hydrogen peroxide                                  | hydrogen peroxide solution, 30 wt. % in H <sub>2</sub> O | sigma-aldrich, St. Louis, USA               |
| 2 mM TMAD                           | 3-(dimethylcarbamoylimino)-1,1-dimethylurea        | diamide                                                  | sigma-aldrich, St. Louis, USA               |
| 0.3 mM BIP                          | 2,2'-bipyridine                                    | 2,2'-bipyridyl, ≥ 99%                                    | sigma-aldrich, St. Louis, USA               |
| 8% NaCl                             | sodium chloride                                    | sodium chloride, > 99.8%                                 | Carl Roth GmbH & Co. KG, Karlsruhe, Germany |
| 0.05% glucose                       | D-glucose                                          | D(+)-glucose                                             | Carl Roth GmbH & Co. KG, Karlsruhe, Germany |
