# Supplementary material
Source: PubMed Central journal article supplement (PMC5795395)
Supplement: supp_RA117.000378_132879_0_supp_9971_jx92jg.pdf [file supp_RA117.000378_132879_0_supp_9971_jx92jg.pdf]

**Supplemental data table 3S: Growth conditions for preparation of spectral libraries**

For construction of spectral libraries, bacteria were grown according to the growth conditions listed below. The harvest at mid-exponential growth phase corresponds to OD<sub>540 nm</sub> 0.5 - 0.6 in LB and OD<sub>500 nm</sub> 0.5 - 0.6 in CDM. T180 = 180 min after entry into stationary growth phase

| medium | growth phase for harvest               | stress condition                    | investigated subcellular condition                          |
|--------|----------------------------------------|-------------------------------------|-------------------------------------------------------------|
| LB     | mid-exponential                        |                                     | cytosol, enriched membrane fraction                         |
| LB     | mid-exponential                        | 0.1 mM Methylviologen               | cytosol, enriched membrane fraction                         |
| LB     | mid-exponential                        | 10 mM H <sub>2</sub> O <sub>2</sub> | cytosol, enriched membrane fraction                         |
| LB     | mid-exponential                        | 2 mM TMAD                           | cytosol, enriched membrane fraction                         |
| LB     | mid-exponential                        | 0.3 mM BIP                          | cytosol, enriched membrane fraction                         |
| LB     | mid-exponential                        | 48 °C                               | cytosol, enriched membrane fraction                         |
| LB     | mid-exponential                        | 8% NaCl                             | cytosol, enriched membrane fraction                         |
| LB     | stationary (T180)                      |                                     | cytosol, enriched membrane fraction, extracellular fraction |
| LB     | late stationary (12 hours cultivation) |                                     | cytosol, enriched membrane fraction, extracellular fraction |
| CDM    | mid-exponential                        | 0.05% glucose                       | cytosol, enriched membrane fraction                         |
| CDM    | stationary (T180)                      |                                     | cytosol, enriched membrane fraction, extracellular fraction |
