# Supplementary material
Source: PubMed Central journal article supplement (PMC5795395)
Supplement: supp_RA117.000378_132879_0_supp_9972_fx92fg.pdf [file supp_RA117.000378_132879_0_supp_9972_fx92fg.pdf]

**Supplemental data table 4S: Chemically synthesised arginine phosphorylated peptides**

The table lists all arginine phosphorylated peptides that have been synthesised chemically. Sequences are derived from naturally occurring putative phosphorylated peptides which were successfully identified from biological samples before.

| modified sequence    | protein | gene name    | phosphosite position |
|----------------------|---------|--------------|----------------------|
| AELPQSR(ph)INER      | Q5HJZ0  | <i>gyrA</i>  | R8                   |
| AFAHYR(ph)W          | Q5HIC9  | <i>rpsG</i>  | R155                 |
| AQGR(ph)ASAINK       | Q5HDW3  | <i>rpIV</i>  | R92                  |
| EDDIPSFIR(ph)NR      | Q5HGP5  | <i>ftsZ</i>  | R378                 |
| ELNR(ph)LLGK         | Q5HHY2  | SACOL0746    | R132                 |
| FR(ph)QGLGR          | Q5HFW8  | <i>dinG</i>  | R836                 |
| FSR(ph)QSGGR         | Q5HIC8  | <i>fusA</i>  | R498                 |
| FYNLSEIAR(ph)QDK     | Q5HEN0  | <i>ftnA</i>  | R109                 |
| GLDINQISLEER(ph)MQER | Q5HIF5  | <i>pdxS</i>  | R289                 |
| GR(ph)NVVLDK         | Q5HEH2  | <i>groEL</i> | R35                  |
| GSNDR(ph)YFQEDK      | Q5HIQ7  | <i>guaB</i>  | R403                 |
| GYLER(ph)DKEDEPLNR   | Q5HDQ7  | SACOL2293    | R267                 |
| HEASIIQQR(ph)QESK    | Q5HGG2  | <i>infB</i>  | R484                 |
| HFR(ph)TGSEGAPEIK    | Q5HF29  | SACOL1795    | R127                 |
| LAR(ph)GINNR         | Q5HHG4  | SACOL0922    | R278                 |
| IER(ph)GYLER         | Q5HDQ7  | SACOL2293    | R262                 |
| LGR(ph)TSDQR         | Q5HDY5  | <i>rpIQ</i>  | R8                   |
| LQYVGTNR(ph)TNK      | Q5HGP8  | <i>murD</i>  | R319                 |
| IR(ph)MNYIR          | Q5HDY0  | <i>infA</i>  | R41                  |
| MNTLIER(ph)NTTIPTSK  | Q5HFI0  | <i>dnaK</i>  | R384                 |
| MNYIR(ph)ILPGDK      | Q5HDY0  | <i>infA</i>  | R46                  |
| MR(ph)GGGNMQQMMK     | Q5HIJ8  | SACOL0521    | R2                   |
| MR(ph)QTFMANESNIER   | Q5HDZ0  | <i>rpIM</i>  | R2                   |
| QINVPGFR(ph)K        | Q5HF97  | <i>tig</i>   | R45                  |
| R(ph)DPDFDQFPK       | Q5HH38  | <i>menB</i>  | R262                 |
| R(ph)EGRPGDDATLTAR   | Q5HGF7  | <i>pnp</i>   | R80                  |
| R(ph)FYNLSEIAR       | Q5HEN0  | <i>ftnA</i>  | R100                 |
| R(ph)GFTNINR         | Q5HDX7  | <i>rpIO</i>  | R64                  |

| modified sequence      | protein | gene name   | phosphosite position |
|------------------------|---------|-------------|----------------------|
| R(ph)GGGGYIR           | Q5HIF2  | <i>ctsR</i> | R62                  |
| R(ph)NPIGSENITGISR     | Q5HEL4  | <i>purB</i> | R269                 |
| R(ph)QELAQTFK          | Q5HFD3  | <i>aspS</i> | R137                 |
| REGR(ph)PGDDATITAR     | Q5HGF7  | <i>pnp</i>  | R83                  |
| SEVDQR(ph)EVFIHITDK    | Q5HHY2  |             | R92                  |
| SISLNR(ph)QGR          | Q5HGZ1  | <i>pdhA</i> | R70                  |
| TLGR(ph)FQLTDIPPAER    | Q5HF10  | <i>dnaK</i> | R426                 |
| VLDMNR(ph)ALR          | Q5HF42  | <i>fts</i>  | R172                 |
| VQDR(ph)QDSNEILK       | Q5HJ86  | <i>essC</i> | R842                 |
| WAFR(ph)SITEDK         | Q5HD12  |             | R555                 |
| YLQDHQVPIR(ph)EFNSYGSR | Q5HG69  | <i>acnA</i> | R710                 |
