# Supplementary material
Source: PubMed Central journal article supplement (PMC5795395)
Supplement: supp_RA117.000378_132879_0_supp_9973_qx92qg.pdf [file supp_RA117.000378_132879_0_supp_9973_qx92qg.pdf]

**Supplemental data table 5S: Criteria for selection of synthetic peptides subjected to TiO<sub>2</sub> enrichment**

The following criteria were considered to select five exemplary synthetic arginine phosphorylated peptides to subject them to TiO<sub>2</sub> enrichment.

| criterion                      | explanation                                                                                                                                             |
|--------------------------------|---------------------------------------------------------------------------------------------------------------------------------------------------------|
| molecular weight               | molecular weight of phosphorylated isoform should cover a wide range (between ~1000 and ~2000 Da)                                                       |
| peptide length                 | length of phosphorylated isoform should cover a wide range (peptides with 8 – 16 amino acids were selected)                                             |
| sequence characteristics       | amino acids with different chemical properties around the phosphosite (group of hydrophilic, hydrophobic, positively or negatively charged amino acids) |
| peptide concentration          | different initial peptide concentration simulated high and low abundant phosphoproteins                                                                 |
| peptide of biological interest | conserved phosphosite between <i>B. subtilis</i> and <i>S. aureus</i> or peptide belonging to regulator proteins were selected                          |
| peptide stability              | stability of arginine phosphorylation is determined at 25 °C, very instable peptides (half-life period < 180 minutes) were omitted                      |
| retention time                 | Peptides were selected to avoid chromatographic coelution as far as possible                                                                            |
