# Supplementary material
Source: PubMed Central journal article supplement (PMC5795395)
Supplement: supp_RA117.000378_132879_0_supp_9974_2x922g.pdf [file supp_RA117.000378_132879_0_supp_9974_2x922g.pdf]

**Supplemental data table 6S: Fraction of TiO<sub>2</sub> enrichment subjected to LC-MS/MS measurement**

The following fractions were separated and analysed by LC-MS/MS.

| fraction           | content                                                                                                                                             |
|--------------------|-----------------------------------------------------------------------------------------------------------------------------------------------------|
| control fraction   | untreated peptide mixture, measured directly                                                                                                        |
| untreated fraction | untreated peptide mixture, measured after 7.5 hours at room temperature (incubation under the same conditions like for TiO <sub>2</sub> enrichment) |
| C8 fraction        | exclusive subjection to C8 purification to scrutinize the retention effects of C8 material                                                          |
| loading fraction   | supernatant of the sample after incubation with TiO <sub>2</sub>                                                                                    |
| wash fraction      | pool of all wash fractions                                                                                                                          |
| elution fraction   | final sample after TiO <sub>2</sub> enrichment and C8 purification                                                                                  |
| mixed fraction     | mixture of loading, wash and elution fraction                                                                                                       |
