# Supplementary material
Source: PubMed Central journal article supplement (PMC5795395)
Supplement: supp_RA117.000378_132879_0_supp_9975_zx92zg.pdf [file supp_RA117.000378_132879_0_supp_9975_zx92zg.pdf]

**Supplemental data table 7S: Source of raw files**

Origin of raw files for the construction of raw spectral libraries.

| cultivation                                                                              | sample preparation                                                          | number of raw files |
|------------------------------------------------------------------------------------------|-----------------------------------------------------------------------------|---------------------|
| wild type, stress condition: 48 °C                                                       | cytosolic fraction, enriched membrane fraction                              | 20                  |
| wild type, stress condition: 0.3 mM BIP                                                  | cytosolic fraction, enriched membrane fraction                              | 21                  |
| wild type, stress condition: 10 mM H <sub>2</sub> O <sub>2</sub>                         | cytosolic fraction, enriched membrane fraction                              | 32                  |
| wild type, stress condition: 0.1 mM methylviologen                                       | cytosolic fraction, enriched membrane fraction                              | 20                  |
| wild type, stress condition: 2 mM TMAD                                                   | cytosolic fraction, enriched membrane fraction                              | 21                  |
| wild type, stress conditions: 8% NaCl                                                    | cytosolic fraction, enriched membrane fraction                              | 21                  |
| wild type, chemical defined medium, stress condition: glucose limitation (0.05% glucose) | cytosolic fraction, enriched membrane fraction                              | 19                  |
| wild type, chemical defined medium                                                       | cytosolic fraction, enriched membrane fraction, extracellular fraction      | 22                  |
| <i>ΔptpB</i> , chemical defined medium                                                   | phosphoenrichment fractions                                                 | 34                  |
| wild type, stationary growth phase                                                       | cytosolic fraction, enriched membrane fraction, extracellular fraction      | 22                  |
| wild type, late stationary growth phase                                                  | cytosolic fraction, enriched membrane fraction, extracellular fraction      | 25                  |
| wild type, exponential growth phase                                                      | cytosolic fraction, enriched membrane fraction, phosphoenrichment fractions | 330                 |
| <i>ΔptpB</i> , exponential growth phase                                                  | phosphoenrichment fractions                                                 | 410                 |
| synthetic arginine phosphorylated peptides                                               |                                                                             | 98                  |
