# Supplementary material
Source: PubMed Central journal article supplement (PMC5795395)
Supplement: supp_RA117.000378_132879_0_supp_9976_1x921g.pdf [file supp_RA117.000378_132879_0_supp_9976_1x921g.pdf]

**Supplemental data table 10S: Number of identified phosphosites**

The table compares the number of identified phosphosites between the wild type and the mutant  $\Delta ptpB$ , differentiated according to the respective phosphorylated amino acid.

| amino acid | phosphosites in wild type samples only | phosphosites in wild type and $\Delta ptpB$ samples | phosphosites in $\Delta ptpB$ samples only |
|------------|----------------------------------------|-----------------------------------------------------|--------------------------------------------|
| arginine   | 0                                      | 8                                                   | 207                                        |
| serine     | 17                                     | 77                                                  | 49                                         |
| threonine  | 11                                     | 47                                                  | 25                                         |
| tyrosine   | 3                                      | 10                                                  | 5                                          |
