# Supplementary material
Source: PubMed Central journal article supplement (PMC5795395)
Supplement: supp_RA117.000378_132879_0_supp_9977_xx92xg.pdf [file supp_RA117.000378_132879_0_supp_9977_xx92xg.pdf]

**Supplemental data table 11S: Chemically synthesised peptides for PtpB specificity assay**

The table lists the phosphorylated peptides used for *in vitro* investigation of substrate specificity of PtpB. Sequences of arginine phosphorylated peptides were derived from naturally occurring putative phosphorylated peptides which were successfully identified from biological samples before.

| sequence with arginine phosphorylation | sequence with ser/thr phosphorylation | protein | gene name   |
|----------------------------------------|---------------------------------------|---------|-------------|
| EDDIPSFIR(ph)NR                        | EDDIPS(ph)FIRNR                       | Q5HGP5  | <i>ftsZ</i> |
| FYNLSEIAR(ph)QDK                       | FYNLS(ph)EIARQDK                      | Q5HEN0  | <i>ftnA</i> |
| LQYVGTNR(ph)TNK                        | LQYVGT(ph)NRTNK                       | Q5HGP8  | <i>murD</i> |
