# Supplementary material
Source: PubMed Central journal article supplement (PMC5795395)
Supplement: supp_RA117.000378_132879_0_supp_9978_xx92xg.pdf [file supp_RA117.000378_132879_0_supp_9978_xx92xg.pdf]

**Supplemental data table 12S: Substrate specificity of PtpB**

The table lists all samples prepared to investigate substrate specificity of PtpB. The columns “no enzyme” and “lysozyme instead of PtpB” and the row “no substrate” were used as negative controls. The column “PtpB” displays phosphatase activity when using substrates phosphorylated at arginine or serine/threonine residues. Further, the column “PtpB + inhibitor” was prepared to test whether phosphatase activity is truly performed by enzymatic activity instead of protein side effects. Due to limited available substrate amount, conditions with “not performed” weren’t tested. Negative results are shown as “-” whereas positive enzymatic reaction is displayed as “+”.

| modified sequence | no enzyme | Lysozyme instead of PtpB | PtpB | PtpB + inhibitor |
|-------------------|-----------|--------------------------|------|------------------|
| No substrate      | -         | -                        | -    | -                |
| EDDIPSFIR(ph)NR   | -         | -                        | +    | -                |
| EDDIPS(ph)FIRNR   | -         | not performed            | -    | not performed    |
| FYNLSEIAR(ph)QDK  | -         | -                        | +    | -                |
| FYNLS(ph)EIARQDK  | -         | not performed            | -    | not performed    |
| LQYVGTNR(ph)TNK   | -         | -                        | +    | -                |
| LQYVGT(ph)NRTNK   | -         | not performed            | -    | not performed    |
